# Supplementary material
Source: PubMed Central journal article supplement (PMC3531565)
Supplement: NIHMS420413-supplement-1.pdf [file NIHMS420413-supplement-1.pdf]

## *Supplementary Information*

# **Correcting pervasive errors in RNA crystallography through enumerative structure prediction**

Fang-Chieh Chou, Parin Sripakdeevong, Sergey M. Dibrov, Thomas Hermann & Rhiju Das \*

| <b>Supplementary Item</b> | <b>Title</b>                                                                                                                                   |
|---------------------------|------------------------------------------------------------------------------------------------------------------------------------------------|
| Supplementary Figure 1    | ERRASER-PHENIX algorithm.                                                                                                                      |
| Supplementary Figure 2    | Base orientation improvements.                                                                                                                 |
| Supplementary Table 1     | Benchmark test set of 24 structural models, sorted by resolution.                                                                              |
| Supplementary Table 2     | Outlier bond lengths and angles of the benchmark assessed by phenix.rna_validate.                                                              |
| Supplementary Table 3     | Clashscore of the benchmark assessed by phenix.clashscore.                                                                                     |
| Supplementary Table 4     | Outlier backbone rotamers and potentially incorrect sugar puckers of the benchmark assessed by phenix.rna_validate.                            |
| Supplementary Table 5     | Number of base-pairs identified by MC-Annotate.                                                                                                |
| Supplementary Table 6     | Summary of notable changes of base orientations ( $\chi$ angle).                                                                               |
| Supplementary Table 7     | $R$ factors of the benchmark.                                                                                                                  |
| Supplementary Table 8     | $R_{\text{free}}$ factors of the benchmark.                                                                                                    |
| Supplementary Table 9     | Similarity analysis between high-resolution and low-resolution models.                                                                         |
| Supplementary Table 10    | Torsional RMSDs (in degrees) between high-resolution and low-resolution models.                                                                |
| Supplementary Table 11    | Similarity analysis for model pairs of the same or similar sequences.                                                                          |
| Supplementary Table 12    | Torsional RMSDs (in degrees) for model pairs of the same or similar sequences.                                                                 |
| Supplementary Table 13    | P-values of Wilcoxon signed-rank test between each method and the starting PDB dataset for all geometric features, $R$ and $R_{\text{free}}$ . |
| Supplementary Results     |                                                                                                                                                |
| Supplementary Notes       |                                                                                                                                                |

**Supplementary Figure 1.** ERRASER-PHENIX algorithm. **(a)** Flow chart of the whole pipeline, the ERRASER steps are enclosed in red. **(b)** Enumerative RNA modeling in Rosetta steps. The blue torsions are explicitly sampled by enumeration and the green torsions are determined by automatic loop closure.

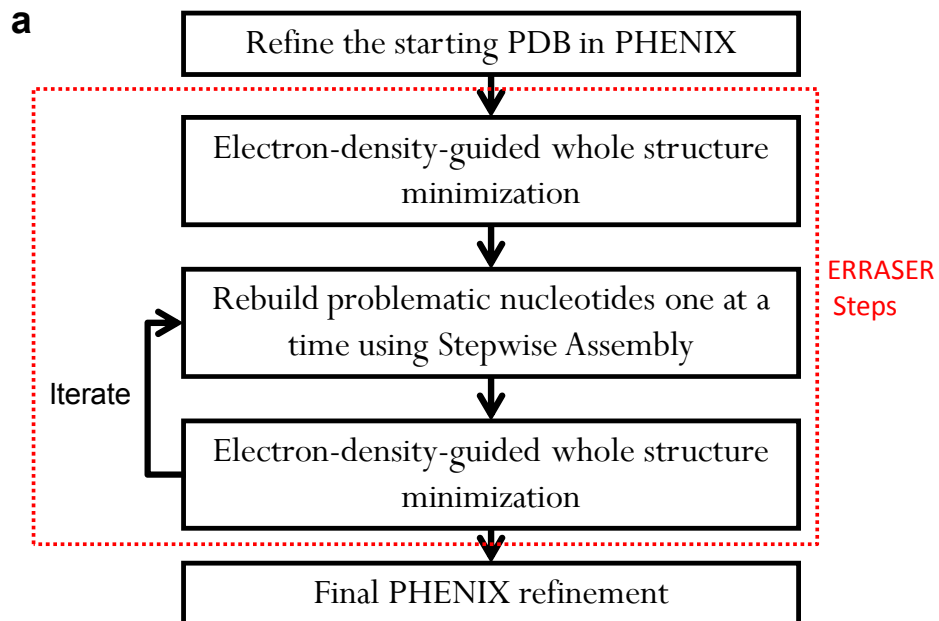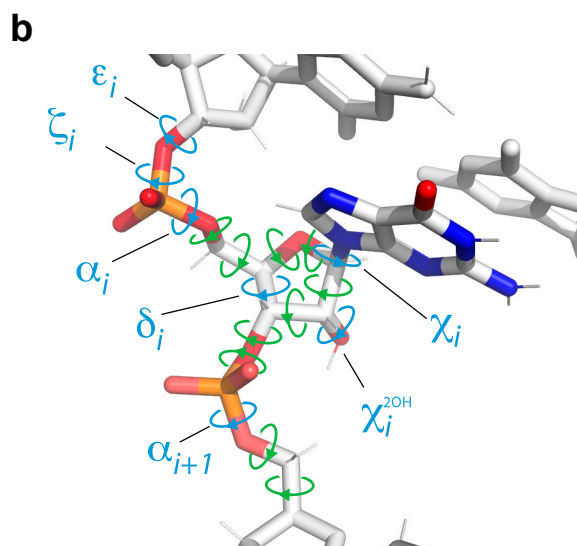

**Supplementary Figure 2.** Base orientation improvements. **(a)** Probability distribution of the  $\chi$  angle in RNA09 (<http://kinemage.biochem.duke.edu/databases/rnadb.php>). The vertical lines show the range of syn vs. anti. Red: Purine; Blue: Pyrimidine; Dotted lines: 20X zoom-in of the distributions. **(b)** Base orientation changes in 2CKY, chain A, residue U35 Red: PDB model; Blue: ERRASER-PHENIX model; Brown: Reference model. **(c, d)** Base orientation changes in the ribosomal subunit 3OTO for residue **(c)** G266 and **(d)** U365. Red: PDB model; Blue: ERRASER-PHENIX model; Brown: Reference model (2VQE). Upper panel: Plot with electron density from 3OTO. Lower panel: Plot with electron density from 2VQE; the ERRASER model is aligned to the 2VQE model.

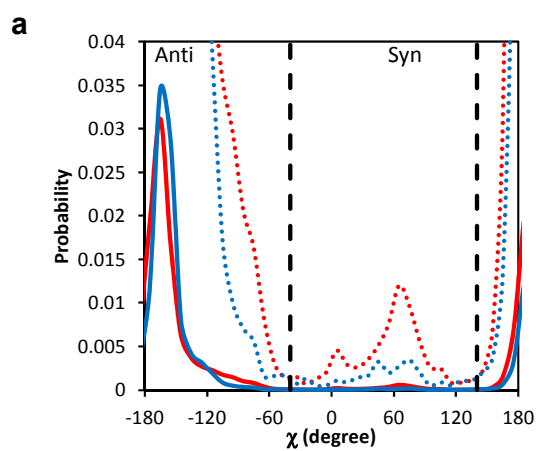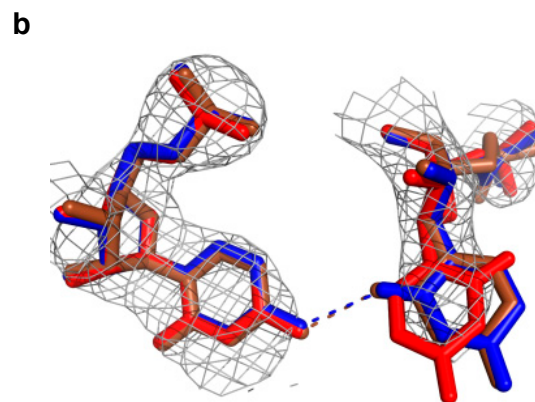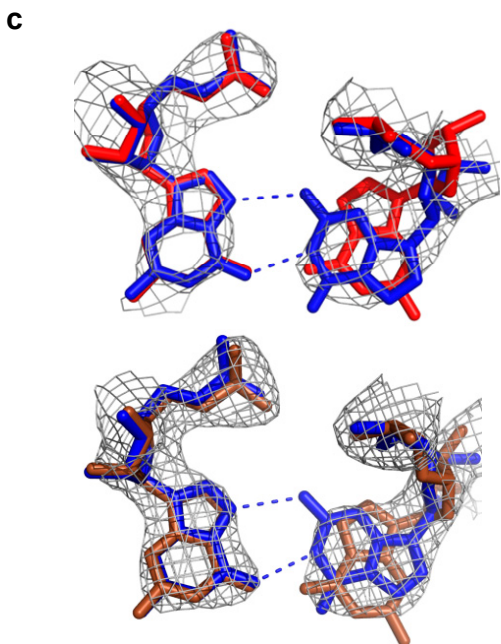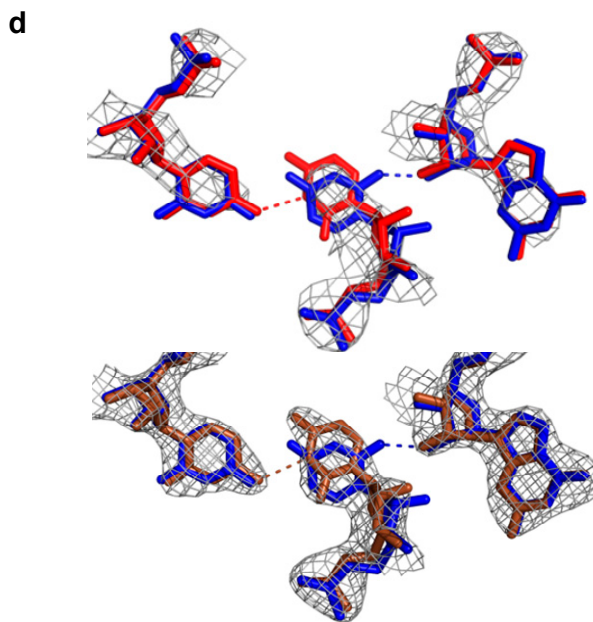

**Supplementary Table 1.** Benchmark test set of 24 structural models, sorted by resolution.

| PDB ID | Name                             | RNA length <sup>a</sup> | Resolution (Å) |
|--------|----------------------------------|-------------------------|----------------|
| 2A43   | RNA Pseudoknot                   | 26                      | 1.34           |
| 3DIL   | Lysine Riboswitch                | 174                     | 1.9            |
| 1U8D   | Guanine Riboswitch               | 68                      | 1.95           |
| 3D2V   | Eukaryotic TPP Riboswitch        | 77 × 2                  | 2              |
| 2GDI   | E. coli. TPP Riboswitch          | 80 × 2                  | 2.05           |
| 3TZR   | HCV IRES Subdomain IIa           | 36                      | 2.21           |
| 3MXH   | c-di-GMP Riboswitch              | 92                      | 2.3            |
| 2PN4   | HCV IRES Subdomain IIa           | 44 × 2                  | 2.32           |
| 2QUS   | Hammerhead Ribozyme              | 69 × 2                  | 2.4            |
| 1Y27   | Guanine Riboswitch               | 68                      | 2.4            |
| 2OIU   | L1 Ribozyme Ligase               | 71 × 2                  | 2.6            |
| 2YGH   | SAM-I Riboswitch                 | 95                      | 2.6            |
| 3DIZ   | Lysine Riboswitch                | 174                     | 2.85           |
| 3E5E   | SAM-III Riboswitch               | 53                      | 2.9            |
| 2GIS   | SAM-I Riboswitch                 | 94                      | 2.9            |
| 2CKY   | Eukaryotic TPP Riboswitch        | 77 × 2                  | 2.9            |
| 2PN3   | HCV IRES Subdomain IIa           | 44                      | 2.9            |
| 3F2Q   | FMN Riboswitch                   | 112                     | 2.95           |
| 3IWN   | c-di-GMP Riboswitch              | 93 × 2                  | 3.2            |
| 3BO3   | <i>Azoarcus</i> Group I Ribozyme | 212                     | 3.4            |
| 3R4F   | Prohead RNA                      | 66                      | 3.5            |
| 3P49   | Glycine Riboswitch               | 169                     | 3.55           |
| 1Y0Q   | Twort Group I Ribozyme           | 233                     | 3.6            |
| 3OTO   | 30S Ribosomal Subunit            | 1,522                   | 3.69           |

<sup>a</sup> The length of RNA component of the molecule. "× 2" indicates 2 copies in the asymmetric unit.

**Supplementary Table 2.** Outlier bond lengths and angles of the benchmark assessed by phenix.rna\_validate.

| PDB ID                      | Outlier bonds(%) |         |              |               |                | Outlier angles(%) |         |              |               |                |
|-----------------------------|------------------|---------|--------------|---------------|----------------|-------------------|---------|--------------|---------------|----------------|
|                             | PDB              | PHENIX  | RNABC-PHENIX | RCrane-PHENIX | ERRASER-PHENIX | PDB               | PHENIX  | RNABC-PHENIX | RCrane-PHENIX | ERRASER-PHENIX |
| 2A43                        | 0                | 0       | 0            | 0             | 0              | 0                 | 0       | 0            | 0             | 0              |
| 3DIL                        | 0                | 0       | 0            | 0             | 0              | 0                 | 0       | 0            | 0             | 0              |
| 1U8D                        | 0                | 0       | 0            | 0             | 0              | 2.99              | 0       | 0            | 0             | 0              |
| 3D2V                        | 0                | 0       | 0            | 0             | 0              | 0                 | 0       | 0            | 0             | 0              |
| 2GDI                        | 0                | 0       | 0            | 0             | 0              | 0                 | 0       | 0            | 0             | 0              |
| 3TZR                        | 0                | 0       | 0            | 0             | 0              | 0                 | 0       | 0            | 2.78          | 0              |
| 3MXH                        | 0                | 0       | 0            | 0             | 0              | 0                 | 0       | 0            | 0             | 0              |
| 2PN4                        | 2.38             | 0       | 0            | 0             | 0              | 2.38              | 0       | 0            | 0             | 0              |
| 2QUS                        | 1.47             | 0       | 0            | 0             | 0              | 3.68              | 0.74    | 0            | 0             | 0              |
| 1Y27                        | 0                | 0       | 0            | 0             | 0              | 4.48              | 0       | 0            | 0             | 0              |
| 2OIU                        | 2.11             | 0       | 0            | 0             | 0              | 0.7               | 0       | 0            | 0             | 0              |
| 2YGH                        | 3.19             | 0       | 0            | 0             | 0              | 2.13              | 0       | 0            | 0             | 0              |
| 3DIZ                        | 0                | 0       | 0            | 0             | 0              | 0                 | 0       | 0            | 0             | 0              |
| 3E5E                        | 1.92             | 0       | 0            | 0             | 0              | 0                 | 0       | 0            | 0             | 0              |
| 2GIS                        | 0                | 0       | 0            | 0             | 0              | 6.38              | 0       | 0            | 0             | 0              |
| 2CKY                        | 1.3              | 0       | 0            | 0             | 0              | 0.65              | 0       | 0            | 0             | 0              |
| 2PN3                        | 0                | 0       | 0            | 0             | 0              | 0                 | 0       | 0            | 0             | 0              |
| 3F2Q                        | 0                | 0       | 0            | 0             | 0              | 0                 | 0       | 0            | 0             | 0              |
| 3IWN                        | 0                | 0       | 0            | 0             | 0              | 4.3               | 0       | 0            | 0             | 0              |
| 3BO3                        | 0.45             | 0       | 0            | 0             | 0              | 0                 | 0       | 0            | 0             | 0              |
| 3R4F                        | 0                | 0       | 0            | 0             | 0              | 0                 | 0       | 0            | 0             | 0              |
| 3P49                        | 0                | 0       | 0            | 0             | 0              | 0.59              | 0       | 0            | 0             | 0              |
| 1Y0Q                        | 0                | 0       | 0            | 0             | 0              | 0                 | 0       | 0            | 0             | 0              |
| 3OTO                        | 0                | 0.2     | 0.27         | 0.07          | 0              | 0                 | 0.07    | 0            | 0.13          | 0              |
| Average                     | 0.53             | 0.01    | 0.01         | 0.003         | 0              | 1.18              | 0.03    | 0            | 0.12          | 0              |
| Avg. high-res <sup>a</sup>  | 0                | 0       | 0            | 0             | 0              | 0.60              | 0       | 0            | 0.56          | 0              |
| Avg. low-res <sup>b</sup>   | 0.08             | 0.03    | 0.05         | 0.01          | 0              | 0.82              | 0.01    | 0            | 0.02          | 0              |
| Equal to or better than PDB |                  | 23 / 24 | 23 / 24      | 23 / 24       | 24 / 24        |                   | 23 / 24 | 24 / 24      | 22 / 24       | 24 / 24        |

Bond lengths and angles that have a deviation  $> 4 \sigma$  compared to PHENIX ideal geometry are counted as outliers.

<sup>a</sup> Average value for the five high resolution models 3DIL, 1U8D, 3D2V, 2GDI and 3TZR. Ultra-high resolution dataset 2A43 was excluded.

<sup>b</sup> Average value for the six lowest resolution models 3IWN, 3BO3, 3R4F, 3P49, 1Y0Q and 3OTO.

**Supplementary Table 3.** Clashscore of the benchmark assessed by phenix.clashscore.

| PDB ID                      | PDB   | PHENIX  | RNABC-PHENIX | RCrane-PHENIX | ERRASER-PHENIX |
|-----------------------------|-------|---------|--------------|---------------|----------------|
| 2A43                        | 1.19  | 1.19    | 2.38         | 2.38          | 1.19           |
| 3DIL                        | 1.40  | 6.29    | 5.94         | 5.94          | 5.94           |
| 1U8D                        | 14.02 | 16.22   | 13.59        | 12.71         | 10.08          |
| 3D2V                        | 11.43 | 8.67    | 8.47         | 10.84         | 8.47           |
| 2GDI                        | 5.52  | 8.41    | 8.98         | 8.60          | 6.50           |
| 3TZR                        | 14.24 | 13.40   | 14.24        | 14.24         | 9.21           |
| 3MXH                        | 8.48  | 5.58    | 6.69         | 8.93          | 6.92           |
| 2PN4                        | 2.48  | 5.31    | 8.85         | 9.21          | 6.02           |
| 2QUS                        | 12.97 | 13.43   | 10.52        | 12.75         | 6.71           |
| 1Y27                        | 6.82  | 10.00   | 6.36         | 5.91          | 7.27           |
| 2OIU                        | 8.48  | 7.61    | 7.61         | 9.13          | 5.00           |
| 2YGH                        | 6.78  | 4.53    | 7.11         | 5.16          | 4.85           |
| 3DIZ                        | 6.17  | 7.40    | 7.05         | 12.34         | 7.23           |
| 3E5E                        | 4.51  | 4.53    | 2.83         | 9.07          | 5.09           |
| 2GIS                        | 43.14 | 23.39   | 22.75        | 9.29          | 8.01           |
| 2CKY                        | 20.47 | 12.99   | 11.22        | 10.83         | 7.68           |
| 2PN3                        | 9.94  | 7.81    | 7.10         | 7.81          | 8.52           |
| 3F2Q                        | 9.74  | 7.80    | 8.91         | 6.40          | 5.85           |
| 3IWN                        | 55.65 | 23.31   | 19.63        | 13.94         | 12.71          |
| 3BO3                        | 11.05 | 13.35   | 15.61        | 12.56         | 16.23          |
| 3R4F                        | 49.62 | 16.07   | 15.12        | 16.54         | 10.85          |
| 3P49                        | 17.56 | 5.43    | 6.57         | 7.43          | 3.00           |
| 1Y0Q                        | 69.53 | 20.44   | 7.96         | 16.19         | 2.39           |
| 3OTO                        | 41.42 | 15.75   | 15.30        | 14.69         | 3.17           |
| Average                     | 18.03 | 10.79   | 10.03        | 10.12         | 7.04           |
| Avg. high-res <sup>a</sup>  | 9.32  | 10.60   | 10.24        | 10.47         | 8.04           |
| Avg. low-res <sup>b</sup>   | 40.81 | 15.73   | 13.37        | 13.56         | 8.06           |
| Equal to or better than PDB |       | 15 / 24 | 17 / 24      | 15 / 24       | 17 / 24        |

Clashscore is the number of serious clashes (atom pairs that have more 0.4 Å van der waals overlap) per 1000 atoms.

<sup>a</sup> Average value for the five high resolution models 3DIL, 1U8D, 3D2V, 2GDI and 3TZR. Ultra-high resolution dataset 2A43 was excluded.

<sup>b</sup> Average value for the six lowest resolution models 3IWN, 3BO3, 3R4F, 3P49, 1Y0Q and 3OTO.

**Supplementary Table 4.** Outlier backbone rotamers and potentially incorrect sugar puckers of the benchmark assessed by phenix.rna\_validate.

| PDB ID                      | Outlier backbone rotamers |         |              |               |                | Potentially incorrect puckers |         |              |               |                |
|-----------------------------|---------------------------|---------|--------------|---------------|----------------|-------------------------------|---------|--------------|---------------|----------------|
|                             | PDB                       | PHENIX  | RNABC-PHENIX | RCrane-PHENIX | ERRASER-PHENIX | PDB                           | PHENIX  | RNABC-PHENIX | RCrane-PHENIX | ERRASER-PHENIX |
| 2A43                        | 1                         | 1       | 1            | 3             | 2              | 0                             | 0       | 0            | 0             | 0              |
| 3DIL                        | 17                        | 13      | 14           | 11            | 11             | 4                             | 2       | 1            | 0             | 0              |
| 1U8D                        | 4                         | 5       | 7            | 3             | 2              | 3                             | 2       | 2            | 0             | 0              |
| 3D2V                        | 23                        | 25      | 26           | 18            | 23             | 5                             | 2       | 2            | 2             | 3              |
| 2GDI                        | 22                        | 17      | 16           | 14            | 11             | 8                             | 2       | 2            | 3             | 0              |
| 3TZR                        | 5                         | 5       | 5            | 3             | 3              | 1                             | 1       | 1            | 0             | 0              |
| 3MXH                        | 8                         | 9       | 10           | 11            | 11             | 2                             | 1       | 1            | 0             | 0              |
| 2PN4                        | 5                         | 2       | 1            | 1             | 0              | 1                             | 0       | 0            | 0             | 0              |
| 2QUS                        | 35                        | 26      | 24           | 18            | 17             | 9                             | 6       | 6            | 2             | 0              |
| 1Y27                        | 13                        | 10      | 8            | 2             | 2              | 4                             | 2       | 2            | 0             | 0              |
| 2OIU                        | 29                        | 17      | 17           | 8             | 6              | 6                             | 0       | 0            | 0             | 0              |
| 2YGH                        | 8                         | 7       | 8            | 5             | 3              | 1                             | 0       | 0            | 0             | 0              |
| 3DIZ                        | 26                        | 19      | 17           | 11            | 12             | 5                             | 1       | 1            | 0             | 0              |
| 3E5E                        | 6                         | 6       | 5            | 4             | 4              | 2                             | 1       | 1            | 0             | 0              |
| 2GIS                        | 21                        | 16      | 20           | 14            | 6              | 8                             | 7       | 7            | 1             | 0              |
| 2CKY                        | 64                        | 44      | 37           | 21            | 18             | 18                            | 5       | 5            | 2             | 2              |
| 2PN3                        | 7                         | 2       | 2            | 2             | 3              | 1                             | 0       | 0            | 0             | 0              |
| 3F2Q                        | 21                        | 15      | 15           | 9             | 3              | 3                             | 2       | 2            | 2             | 0              |
| 3IWN                        | 52                        | 42      | 42           | 29            | 27             | 23                            | 12      | 11           | 4             | 2              |
| 3BO3                        | 78                        | 70      | 63           | 22            | 19             | 15                            | 6       | 6            | 1             | 0              |
| 3R4F                        | 16                        | 13      | 17           | 10            | 6              | 5                             | 1       | 1            | 1             | 0              |
| 3P49                        | 73                        | 57      | 60           | 31            | 22             | 19                            | 11      | 11           | 8             | 1              |
| 1Y0Q                        | 52                        | 59      | 58           | 55            | 21             | 20                            | 14      | 11           | 8             | 0              |
| 3OTO                        | 279                       | 301     | 313          | 253           | 145            | 34                            | 35      | 37           | 27            | 0              |
| Average (%) <sup>a</sup>    | 18.8                      | 15.2    | 15.3         | 10.3          | 7.9            | 5.0                           | 2.4     | 2.4          | 1.0           | 0.2            |
| Avg. high-res <sup>b</sup>  | 11.7                      | 11.2    | 11.9         | 8.0           | 7.9            | 3.6                           | 1.9     | 1.8          | 0.6           | 0.4            |
| Avg. low-res <sup>c</sup>   | 28.6                      | 25.6    | 26.4         | 16.6          | 10.7           | 8.1                           | 4.3     | 4.0          | 2.3           | 0.3            |
| Equal to or better than PDB |                           | 19 / 24 | 18 / 24      | 21 / 24       | 22 / 24        |                               | 23 / 24 | 23 / 24      | 24 / 24       | 24 / 24        |

The backbone rotamer assignment is an effort of RNA Ontology Consortium<sup>1</sup>. Sugar pucker errors are determined using a geometric criterion based on the distance between the glycosidic bond vector (C1'-N1/9) and the following (3') phosphate<sup>2</sup>.

<sup>a</sup> Average error rate as percentage. Obtained by dividing the number of outliers with the total number of nucleotides.

<sup>b</sup> Average value for the five high resolution models 3DIL, 1U8D, 3D2V, 2GDI and 3TZR. Ultra-high resolution dataset 2A43 was excluded. The values are normalized by the numbers of nucleotides in the models.

<sup>c</sup> Average value (normalized) for the six lowest resolution models 3IWN, 3BO3, 3R4F, 3P49, 1Y0Q and 3OTO.

**Supplementary Table 5.** Number of base-pairs identified by MC-Annotate.

| PDB ID                      | PDB  | PHENIX  | RNABC-PHENIX | RCrane-PHENIX | ERRASER-PHENIX |
|-----------------------------|------|---------|--------------|---------------|----------------|
| 2A43                        | 12   | 12      | 12           | 12            | 12             |
| 3DIL                        | 88   | 89      | 89           | 90            | 91             |
| 1U8D                        | 31   | 32      | 32           | 32            | 32             |
| 3D2V                        | 69   | 68      | 68           | 69            | 68             |
| 2GDI                        | 70   | 70      | 70           | 71            | 70             |
| 3TZR                        | 15   | 15      | 15           | 15            | 15             |
| 3MXH                        | 38   | 40      | 40           | 38            | 40             |
| 2PN4                        | 32   | 32      | 32           | 32            | 32             |
| 2QUS                        | 52   | 52      | 51           | 52            | 52             |
| 1Y27                        | 36   | 34      | 35           | 34            | 36             |
| 2OIU                        | 60   | 63      | 62           | 62            | 64             |
| 2YGH                        | 37   | 37      | 37           | 39            | 43             |
| 3DIZ                        | 88   | 89      | 89           | 89            | 88             |
| 3E5E                        | 20   | 20      | 20           | 20            | 21             |
| 2GIS                        | 40   | 36      | 38           | 37            | 40             |
| 2CKY                        | 70   | 67      | 67           | 66            | 69             |
| 2PN3                        | 16   | 17      | 16           | 16            | 16             |
| 3F2Q                        | 43   | 44      | 44           | 44            | 44             |
| 3IWN                        | 64   | 64      | 65           | 65            | 77             |
| 3BO3                        | 86   | 85      | 81           | 85            | 92             |
| 3R4F                        | 25   | 21      | 21           | 21            | 23             |
| 3P49                        | 44   | 43      | 46           | 44            | 60             |
| 1Y0Q                        | 97   | 89      | 87           | 92            | 104            |
| 3OTO                        | 561  | 593     | 596          | 587           | 692            |
| Average (%) <sup>a</sup>    | 83.4 | 82.7    | 82.7         | 82.8          | 87.0           |
| Avg. high-res <sup>b</sup>  | 91.4 | 92.0    | 92.0         | 92.7          | 92.4           |
| Avg. low-res <sup>c</sup>   | 72.2 | 69.4    | 69.3         | 70.1          | 81.5           |
| Equal to or better than PDB |      | 16 / 24 | 16 / 24      | 18 / 24       | 21 / 24        |

<sup>a</sup> Average value of (# of base-pairs) / (# of residues)  $\times$  2. The normalization is based on that the # of base-pairs in an ideal RNA duplex is half of the # of residues.

<sup>b</sup> Average value calculated for the five high resolution models 3DIL, 1U8D, 3D2V, 2GDI and 3TZR. Ultra-high resolution dataset 2A43 was excluded.

<sup>c</sup> Average value for the six lowest resolution models 3IWN, 3BO3, 3R4F, 3P49, 1Y0Q and 3OTO.



**Supplementary Table 6. Summary of notable changes of base orientations ( $\chi$  angle).**

| PDB ID            | Resolution | Chain-Residue | Base Type | PDB      |        | ERRASER-PHENIX |        | Reference PDB | Resolution | Chain-Residue | PDB      |        |
|-------------------|------------|---------------|-----------|----------|--------|----------------|--------|---------------|------------|---------------|----------|--------|
|                   |            |               |           | syn/anti | $\chi$ | syn/anti       | $\chi$ |               |            |               | syn/anti | $\chi$ |
| 3DIL <sup>a</sup> | 1.9        | A-110         | G         | syn      | 75     | anti           | -88    | NA            |            |               |          |        |
| 3D2V              | 2          | B-35          | U         | syn      | 44     | anti           | -123   | 3D2V          | 2          | A-35          | anti     | -110   |
| 2GDI              | 2.05       | X-55          | C         | anti     | -65    | anti           | -160   | NA            |            |               |          |        |
|                   |            | Y-55          | C         | syn      | 52     | anti           | -135   |               |            |               |          |        |
| 2QUS <sup>b</sup> | 2.4        | A-22          | G         | syn      | 97     | anti           | -78    | NA            |            |               |          |        |
|                   |            | B-23          | C         | syn      | 56     | anti           | -119   |               |            |               |          |        |
| 2OIU              | 2.6        | P-19          | U         | syn      | 58     | anti           | -136   | 2OIU          | 2.6        | Q-19          | anti     | -112   |
| 2YGH              | 2.6        | A-14          | A         | syn      | 41     | anti           | -148   | 3GX5          | 2.4        | A-9           | anti     | -85    |
| 3DIZ <sup>a</sup> | 2.85       | A-110         | G         | syn      | 80     | anti           | -85    | NA            |            |               |          |        |
| 2CKY              | 2.9        | A-1           | G         | syn      | -7     | anti           | 174    | 3D2V          | 2          | A-1           | anti     | -178   |
|                   |            | A-35          | U         | syn      | 51     | anti           | -116   |               |            | A-35          | anti     | -110   |
|                   |            | A-74          | U         | syn      | 36     | anti           | -167   |               |            | A-74          | anti     | -113   |
|                   |            | B-67          | C         | syn      | -39    | anti           | -129   |               |            | B-67          | anti     | -100   |
|                   |            | B-74          | U         | anti     | -50    | anti           | -140   |               |            | B-74          | anti     | -156   |
| 3IWN              | 3.2        | A-7           | C         | anti     | -51    | anti           | -162   | 3MXH          | 2.3        | R-17          | anti     | -155   |
|                   |            | A-33          | A         | anti     | -100   | syn            | 82     |               |            | R-33          | syn      | 67     |
| 3BO3              | 3.4        | B-21          | C         | syn      | 91     | anti           | -150   | NA            |            |               |          |        |
| 3P49              | 3.55       | A-731         | C         | anti     | -58    | anti           | -152   | NA            |            |               |          |        |
|                   |            | A-732         | C         | syn      | -33    | anti           | -129   |               |            |               |          |        |
| 1Y0Q <sup>c</sup> | 3.6        | A-35          | A         | anti     | 150    | anti           | -77    | 3BO3          | 3.4        | NA            |          |        |
|                   |            | A-113         | A         | syn      | 21     | anti           | -176   |               |            | B-121         | anti     | 177    |
|                   |            | A-158         | A         | syn      | 51     | anti           | -152   |               |            | B-134         | anti     | -167   |
| 3OTO              | 3.69       | A-91          | C         | anti     | -58    | anti           | -164   | 2VQE          | 2.5        | A-91          | anti     | -161   |
|                   |            | A-108         | G         | syn      | -11    | anti           | 180    |               |            | A-108         | syn      | 3      |
|                   |            | A-266         | G         | anti     | -59    | syn            | 54     |               |            | A-266         | anti     | -83    |
|                   |            | A-328         | C         | syn      | 116    | anti           | -85    |               |            | A-328         | syn      | 110    |
|                   |            | A-346         | G         | syn      | 46     | anti           | -143   |               |            | A-346         | syn      | 61     |
|                   |            | A-365         | U         | syn      | 43     | anti           | -157   |               |            | A-365         | syn      | 53     |
|                   |            | A-421         | U         | syn      | 33     | anti           | -134   |               |            | A-421         | syn      | 6      |
|                   |            | A-839         | U         | syn      | 72     | anti           | -164   |               |            | A-839         | syn      | 117    |
|                   |            | A-1004        | A         | anti     | -87    | syn            | 67     |               |            | A-1004        | anti     | -67    |
|                   |            | A-1054        | C         | syn      | 81     | anti           | -139   |               |            | A-1054        | syn      | 77     |
| A-1279            | A          | syn           | 43        | anti     | -101   | A-1279         | syn    | 83            |            |               |          |        |

The table shows all the residues with  $\Delta\chi > 90^\circ$  upon ERRASER-PHENIX refinement. The definition of syn and anti conformation is: syn:  $-40 < \chi \leq 140$ ; otherwise is anti. See supplementary results for discussion.

<sup>a</sup> 3DIL and 3DIZ are structures of the same sequence with different resolution. However, ERRASER flipped residue 110 in both structure from syn to anti. Therefore we did not perform the high-resolution vs. low-resolution comparison in the table.

<sup>b</sup> For 2QUS, the backbone conformations for residue 22-23 for chain A and chain B, as well as the structures of nearby region, are quite different. Therefore we did not use the different chains as reference models in our analysis.

<sup>c</sup> 1Y0Q was compared to a homologous structure 3BO3. The two structures are group I ribozymes from different species. Residue 35 has no homologous partner in 3BO3 so was not compared.

**Supplementary Table 7.** *R* factors of the benchmark.

| PDB ID                      | PDB<br>(Deposited) | PDB<br>(PHENIX calculated) | PHENIX  | RNABC-<br>PHENIX | RCrane-<br>PHENIX | ERRASER<br>-PHENIX |
|-----------------------------|--------------------|----------------------------|---------|------------------|-------------------|--------------------|
| 2A43                        | 0.114              | 0.128                      | 0.140   | 0.140            | 0.145             | 0.137              |
| 3DIL                        | 0.192              | 0.183                      | 0.172   | 0.169            | 0.171             | 0.170              |
| 1U8D                        | 0.178              | 0.177                      | 0.166   | 0.167            | 0.165             | 0.162              |
| 3D2V                        | 0.207              | 0.202                      | 0.212   | 0.210            | 0.224             | 0.211              |
| 2GDI                        | 0.208              | 0.199                      | 0.188   | 0.189            | 0.196             | 0.187              |
| 3TZR                        | 0.182              | 0.182                      | 0.184   | 0.185            | 0.188             | 0.180              |
| 3MXH                        | 0.202              | 0.222                      | 0.196   | 0.196            | 0.202             | 0.199              |
| 2PN4                        | 0.261              | 0.258                      | 0.264   | 0.270            | 0.268             | 0.264              |
| 2QUS                        | 0.184              | 0.184                      | 0.190   | 0.188            | 0.189             | 0.186              |
| 1Y27                        | 0.232              | 0.224                      | 0.204   | 0.205            | 0.207             | 0.203              |
| 2OIU                        | 0.203              | 0.196                      | 0.190   | 0.193            | 0.196             | 0.194              |
| 2YGH                        | 0.200              | 0.186                      | 0.197   | 0.206            | 0.199             | 0.205              |
| 3DIZ                        | 0.193              | 0.200                      | 0.198   | 0.201            | 0.203             | 0.202              |
| 3E5E                        | 0.222              | 0.224                      | 0.201   | 0.199            | 0.270             | 0.196              |
| 2GIS                        | 0.266              | 0.249                      | 0.216   | 0.219            | 0.218             | 0.216              |
| 2CKY                        | 0.183              | 0.194                      | 0.180   | 0.179            | 0.175             | 0.176              |
| 2PN3                        | 0.229              | 0.214                      | 0.213   | 0.212            | 0.239             | 0.210              |
| 3F2Q                        | 0.200              | 0.197                      | 0.199   | 0.202            | 0.202             | 0.200              |
| 3IWN                        | 0.222              | 0.218                      | 0.224   | 0.224            | 0.239             | 0.215              |
| 3BO3                        | 0.282              | 0.266                      | 0.244   | 0.240            | 0.274             | 0.239              |
| 3R4F                        | 0.239              | 0.221                      | 0.184   | 0.182            | 0.187             | 0.179              |
| 3P49                        | 0.282              | 0.279                      | 0.227   | 0.233            | 0.218             | 0.233              |
| 1Y0Q <sup>a</sup>           | 0.277              | 0.265                      | 0.227   | 0.221            | 0.225             | 0.226              |
| 3OTO                        | 0.173              | 0.177                      | 0.163   | 0.164            | 0.163             | 0.186              |
| Average                     | 0.214              | 0.210                      | 0.199   | 0.200            | 0.207             | 0.199              |
| Avg. high-res <sup>a</sup>  | 0.193              | 0.188                      | 0.185   | 0.184            | 0.189             | 0.182              |
| Avg. low-res <sup>b</sup>   | 0.246              | 0.238                      | 0.211   | 0.211            | 0.218             | 0.213              |
| Equal to or better than PDB |                    |                            | 16 / 24 | 15 / 24          | 12 / 24           | 16 / 24            |

<sup>a</sup> Average value for the five high resolution models 3DIL, 1U8D, 3D2V, 2GDI and 3TZR. Ultra-high resolution dataset 2A43 was excluded.

<sup>b</sup> Average value for the six lowest resolution models 3IWN, 3BO3, 3R4F, 3P49, 1Y0Q and 3OTO.

**Supplementary Table 8.**  $R_{\text{free}}$  factors of the benchmark.

| PDB ID                      | PDB<br>(Deposited) | PDB<br>(PHENIX calculated) | PHENIX  | RNABC-<br>PHENIX | RCrane-<br>PHENIX | ERRASER<br>-PHENIX |
|-----------------------------|--------------------|----------------------------|---------|------------------|-------------------|--------------------|
| 2A43                        | 0.190              | 0.180                      | 0.166   | 0.165            | 0.176             | 0.162              |
| 3DIL                        | 0.229              | 0.213                      | 0.194   | 0.193            | 0.199             | 0.199              |
| 1U8D                        | 0.228              | 0.218                      | 0.198   | 0.202            | 0.202             | 0.198              |
| 3D2V                        | 0.251              | 0.244                      | 0.233   | 0.235            | 0.249             | 0.239              |
| 2GDI                        | 0.241              | 0.229                      | 0.216   | 0.219            | 0.219             | 0.217              |
| 3TZR                        | 0.245              | 0.242                      | 0.239   | 0.239            | 0.246             | 0.240              |
| 3MXH                        | 0.239              | 0.270                      | 0.231   | 0.233            | 0.239             | 0.235              |
| 2PN4                        | 0.320              | 0.323                      | 0.320   | 0.319            | 0.323             | 0.320              |
| 2QUS                        | 0.253              | 0.253                      | 0.235   | 0.231            | 0.234             | 0.225              |
| 1Y27                        | 0.264              | 0.255                      | 0.235   | 0.238            | 0.238             | 0.235              |
| 2OIU                        | 0.238              | 0.233                      | 0.224   | 0.225            | 0.225             | 0.224              |
| 2YGH                        | 0.259              | 0.244                      | 0.234   | 0.234            | 0.237             | 0.236              |
| 3DIZ                        | 0.244              | 0.246                      | 0.239   | 0.239            | 0.240             | 0.235              |
| 3E5E                        | 0.259              | 0.258                      | 0.254   | 0.256            | 0.348             | 0.261              |
| 2GIS                        | 0.289              | 0.270                      | 0.252   | 0.252            | 0.256             | 0.246              |
| 2CKY                        | 0.250              | 0.253                      | 0.236   | 0.235            | 0.231             | 0.234              |
| 2PN3                        | 0.283              | 0.274                      | 0.272   | 0.273            | 0.282             | 0.267              |
| 3F2Q                        | 0.243              | 0.254                      | 0.249   | 0.255            | 0.256             | 0.260              |
| 3IWN                        | 0.292              | 0.287                      | 0.282   | 0.281            | 0.297             | 0.270              |
| 3BO3                        | 0.325              | 0.312                      | 0.295   | 0.293            | 0.316             | 0.295              |
| 3R4F                        | 0.271              | 0.252                      | 0.245   | 0.241            | 0.243             | 0.239              |
| 3P49                        | 0.310              | 0.299                      | 0.290   | 0.279            | 0.280             | 0.295              |
| 1Y0Q                        | 0.310              | 0.307                      | 0.294   | 0.289            | 0.292             | 0.291              |
| 3OTO                        | 0.231              | 0.232                      | 0.225   | 0.225            | 0.223             | 0.233              |
| Average                     | 0.261              | 0.256                      | 0.244   | 0.244            | 0.252             | 0.244              |
| Avg. high-res <sup>a</sup>  | 0.239              | 0.229                      | 0.216   | 0.218            | 0.223             | 0.219              |
| Avg. low-res <sup>b</sup>   | 0.290              | 0.281                      | 0.272   | 0.268            | 0.275             | 0.270              |
| Equal to or better than PDB |                    |                            | 24 / 24 | 24 / 24          | 17 / 24           | 21 / 24            |

<sup>a</sup> Average value for the five high resolution models 3DIL, 1U8D, 3D2V, 2GDI and 3TZR. Ultra-high resolution dataset 2A43 was excluded.

<sup>b</sup> Average value for the six lowest resolution models 3IWN, 3BO3, 3R4F, 3P49, 1Y0Q and 3OTO.

**Supplementary Table 9.** Similarity analysis between high-resolution and low-resolution models.

| High res. models            | Low res. models | Similar residues (%) <sup>a</sup> |         |              |               |                | Similar puckers (%) <sup>b</sup> |         |              |               |                |
|-----------------------------|-----------------|-----------------------------------|---------|--------------|---------------|----------------|----------------------------------|---------|--------------|---------------|----------------|
|                             |                 | PDB                               | PHENIX  | RNABC-PHENIX | RCrane-PHENIX | ERRASER-PHENIX | PDB                              | PHENIX  | RNABC-PHENIX | RCrane-PHENIX | ERRASER-PHENIX |
| 4FE5 <sup>c</sup>           | 1U8D            | 87.5                              | 87.5    | 87.5         | 89.1          | 92.2           | 98.4                             | 96.9    | 96.9         | 98.4          | 100.0          |
| 4FE5 <sup>c</sup>           | 1Y27            | 67.2                              | 78.1    | 78.1         | 82.8          | 85.9           | 93.8                             | 100.0   | 100.0        | 100.0         | 100.0          |
| 1U8D                        | 1Y27            | 68.8                              | 76.6    | 75.0         | 84.4          | 82.8           | 95.3                             | 96.9    | 96.9         | 98.4          | 96.9           |
| 2YGH                        | 2GIS            | 65.6                              | 66.7    | 61.3         | 68.8          | 81.7           | 88.2                             | 92.5    | 92.5         | 95.7          | 97.9           |
| 3DIL                        | 3DIZ            | 94.3                              | 93.7    | 92.5         | 85.1          | 94.8           | 98.9                             | 98.9    | 98.9         | 98.9          | 98.3           |
| 3MXH                        | 3IWN_1          | 53.3                              | 54.6    | 55.8         | 61.0          | 71.4           | 85.7                             | 92.2    | 92.2         | 89.6          | 94.8           |
| 3MXH                        | 3IWN_2          | 45.5                              | 49.4    | 48.1         | 50.7          | 63.6           | 81.8                             | 90.9    | 90.9         | 89.6          | 90.9           |
| 3D2V_1                      | 2CKY_1          | 57.1                              | 71.4    | 72.7         | 66.2          | 79.2           | 85.7                             | 96.1    | 96.1         | 94.8          | 97.4           |
| 3D2V_1                      | 2CKY_2          | 42.9                              | 64.9    | 67.5         | 74.0          | 75.3           | 89.6                             | 97.4    | 97.4         | 97.4          | 94.8           |
| 3D2V_2                      | 2CKY_1          | 54.6                              | 61.0    | 62.3         | 63.6          | 77.9           | 92.2                             | 100.0   | 100.0        | 98.7          | 100.0          |
| 3D2V_2                      | 2CKY_2          | 45.5                              | 59.7    | 64.9         | 68.8          | 71.4           | 90.9                             | 98.7    | 97.4         | 97.4          | 97.4           |
| 2PN4_1                      | 2PN3            | 77.3                              | 84.1    | 81.8         | 86.4          | 86.4           | 95.5                             | 97.7    | 97.7         | 93.2          | 97.7           |
| 2PN4_2                      | 2PN3            | 84.1                              | 84.1    | 86.4         | 81.8          | 84.1           | 93.2                             | 95.5    | 95.5         | 93.2          | 95.5           |
| Average                     |                 | 64.9                              | 71.7    | 71.9         | 74.1          | 80.5           | 91.5                             | 96.4    | 96.3         | 95.8          | 97.0           |
| Equal to or better than PDB |                 |                                   | 12 / 13 | 11 / 13      | 11 / 13       | 13 / 13        |                                  | 12 / 13 | 12 / 13      | 12 / 13       | 12 / 13        |

<sup>a</sup> Nucleotide pair in which the differences between all torsion angles are smaller than 40°.

<sup>b</sup> Nucleotide pair in which the difference between  $\delta$  angle is smaller than 20°.

<sup>c</sup> 4FE5 is a ultra-high resolution (1.32 Å) guanine riboswitch structure not in the benchmark set.

**Supplementary Table 10.** Torsional RMSDs (in degrees) between high-resolution and low-resolution models.

| High res. models            | Low res. models | PDB  | PHENIX  | RNABC-PHENIX | RCrane-PHENIX | ERRASER-PHENIX |
|-----------------------------|-----------------|------|---------|--------------|---------------|----------------|
| 4FE5                        | 1U8D            | 25.1 | 24.5    | 25.8         | 21.5          | 15.3           |
| 4FE5                        | 1Y27            | 39.3 | 36.7    | 33.5         | 33.2          | 30.5           |
| 1U8D                        | 1Y27            | 37.3 | 35.1    | 32.0         | 30.3          | 31.4           |
| 2YGH                        | 2GIS            | 38.4 | 37.7    | 38.2         | 32.2          | 29.0           |
| 3DIL                        | 3DIZ            | 13.5 | 12.8    | 13.4         | 26.2          | 16.4           |
| 3MXH                        | 3IWN_1          | 48.0 | 45.6    | 44.2         | 41.3          | 37.3           |
| 3MXH                        | 3IWN_2          | 51.9 | 49.5    | 48.8         | 48.2          | 42.2           |
| 3D2V_1                      | 2CKY_1          | 41.0 | 38.7    | 37.5         | 38.7          | 33.0           |
| 3D2V_1                      | 2CKY_2          | 40.9 | 37.4    | 35.1         | 33.8          | 35.2           |
| 3D2V_2                      | 2CKY_1          | 42.6 | 39.5    | 38.6         | 38.8          | 31.5           |
| 3D2V_2                      | 2CKY_2          | 42.7 | 40.2    | 39.7         | 37.2          | 36.9           |
| 2PN4_1                      | 2PN3            | 25.0 | 21.7    | 21.8         | 23.6          | 23.8           |
| 2PN4_2                      | 2PN3            | 24.5 | 22.9    | 22.7         | 22.8          | 23.9           |
| Average                     |                 | 36.2 | 34.0    | 33.2         | 32.9          | 29.7           |
| Equal to or better than PDB |                 |      | 13 / 13 | 12 / 13      | 12 / 13       | 12 / 13        |

RMSD is calculated between all the torsion angles in the model pair.

**Supplementary Table 11.** Similarity analysis for model pairs of the same or similar sequences.

| Chain1                      | Chain 2 | Similar residues (%) <sup>a</sup> |         |              |               |                | Similar puckers (%) <sup>b</sup> |         |              |               |                |
|-----------------------------|---------|-----------------------------------|---------|--------------|---------------|----------------|----------------------------------|---------|--------------|---------------|----------------|
|                             |         | PDB                               | PHENIX  | RNABC-PHENIX | RCrane-PHENIX | ERRASER-PHENIX | PDB                              | PHENIX  | RNABC-PHENIX | RCrane-PHENIX | ERRASER-PHENIX |
| 2GDI_1                      | 2GDI_2  | 78.8                              | 86.1    | 86.1         | 86.1          | 86.1           | 97.5                             | 100.0   | 100.0        | 98.7          | 98.7           |
| 2OIU_1                      | 2OIU_2  | 42.3                              | 53.5    | 57.8         | 63.4          | 69.0           | 87.3                             | 94.4    | 94.4         | 94.4          | 95.8           |
| 2QUS_1                      | 2QUS_2  | 60.9                              | 75.4    | 75.4         | 75.4          | 81.2           | 92.8                             | 94.2    | 94.2         | 94.2          | 94.2           |
| 3P49_1                      | 3P49_2  | 50.7                              | 50.7    | 53.3         | 58.4          | 68.8           | 94.8                             | 97.4    | 97.4         | 97.4          | 92.2           |
| 1U8D                        | 1Y27    | 77.9                              | 77.9    | 80.5         | 88.3          | 87.0           | 97.4                             | 98.7    | 98.7         | 97.4          | 97.4           |
| 2YGH                        | 2GIS    | 59.7                              | 71.4    | 72.7         | 84.4          | 84.4           | 90.9                             | 98.7    | 98.7         | 98.7          | 98.7           |
| 3DIL                        | 3DIZ    | 86.4                              | 90.9    | 88.6         | 90.9          | 90.9           | 97.7                             | 97.7    | 97.7         | 97.7          | 97.7           |
| 3MXH                        | 3IWN_1  | 34.2                              | 39.5    | 34.2         | 68.4          | 73.7           | 84.2                             | 94.7    | 92.1         | 94.7          | 100.0          |
| 3MXH                        | 3IWN_2  | 68.8                              | 78.1    | 82.8         | 85.9          | 84.4           | 95.3                             | 100.0   | 100.0        | 100.0         | 100.0          |
| 3IWN_1                      | 3IWN_2  | 65.6                              | 71.0    | 66.7         | 71.0          | 89.3           | 88.2                             | 93.6    | 93.6         | 95.7          | 97.9           |
| 3D2V_1                      | 3D2V_2  | 94.3                              | 95.4    | 94.8         | 92.5          | 97.7           | 98.9                             | 100.0   | 100.0        | 100.0         | 100.0          |
| 3D2V_1                      | 2CKY_1  | 53.3                              | 55.8    | 54.6         | 64.9          | 72.7           | 85.7                             | 92.2    | 92.2         | 92.2          | 96.1           |
| 3D2V_1                      | 2CKY_2  | 45.5                              | 48.1    | 49.4         | 55.8          | 62.3           | 81.8                             | 92.2    | 92.2         | 93.5          | 90.9           |
| 3D2V_2                      | 2CKY_1  | 57.1                              | 70.1    | 70.1         | 77.9          | 85.7           | 85.7                             | 98.7    | 98.7         | 98.7          | 98.7           |
| 3D2V_2                      | 2CKY_2  | 42.9                              | 64.9    | 70.1         | 79.2          | 77.9           | 89.6                             | 100.0   | 100.0        | 100.0         | 97.4           |
| 2CKY_1                      | 2CKY_2  | 54.6                              | 63.6    | 64.9         | 79.2          | 83.1           | 92.2                             | 100.0   | 100.0        | 98.7          | 98.7           |
| 2PN4_1                      | 2PN4_2  | 45.5                              | 62.3    | 64.9         | 77.9          | 74.0           | 90.9                             | 98.7    | 98.7         | 97.4          | 100.0          |
| 2PN4_1                      | 2PN3    | 77.3                              | 81.8    | 79.6         | 84.1          | 81.8           | 95.5                             | 97.7    | 97.7         | 93.2          | 97.7           |
| 2PN4_2                      | 2PN3    | 84.1                              | 84.1    | 86.4         | 93.2          | 86.4           | 93.2                             | 95.5    | 95.5         | 95.5          | 95.5           |
| Average                     |         | 62.1                              | 69.5    | 70.2         | 77.7          | 80.9           | 91.6                             | 97.1    | 96.9         | 96.7          | 97.2           |
| Equal to or better than PDB |         |                                   | 19 / 19 | 19 / 19      | 18 / 19       | 19 / 19        |                                  | 19 / 19 | 19 / 19      | 18 / 19       | 18 / 19        |

<sup>a</sup> Nucleotide pair in which the differences between all torsion angles are smaller than 40°.

<sup>b</sup> Nucleotide pair in which the difference between  $\delta$  angle is smaller than 20°.

**Supplementary Table 12.** Torsional RMSDs (in degrees) for model pairs of the same or similar sequences.

| Chain 1                     | Chain 2 | PDB  | PHENIX  | RNABC-PHENIX | RCrane-PHENIX | ERRASER-PHENIX |
|-----------------------------|---------|------|---------|--------------|---------------|----------------|
| 2GDI_1                      | 2GDI_2  | 25.0 | 23.4    | 23.4         | 24.3          | 22.8           |
| 2OIU_1                      | 2OIU_2  | 44.5 | 41.7    | 39.8         | 39.9          | 34.6           |
| 2QUS_1                      | 2QUS_2  | 46.6 | 42.3    | 40.4         | 32.5          | 29.0           |
| 3P49_1                      | 3P49_2  | 42.5 | 41.6    | 40.8         | 36.1          | 38.5           |
| 1U8D                        | 1Y27    | 31.6 | 31.4    | 25.3         | 19.4          | 22.2           |
| 2YGH                        | 2GIS    | 32.1 | 31.9    | 32.0         | 24.5          | 23.2           |
| 3DIL                        | 3DIZ    | 19.2 | 17.5    | 22.4         | 17.7          | 16.4           |
| 3MXH                        | 3IWN_1  | 50.9 | 49.7    | 51.7         | 37.0          | 32.9           |
| 3MXH                        | 3IWN_2  | 37.3 | 34.4    | 26.0         | 28.2          | 28.8           |
| 3IWN_1                      | 3IWN_2  | 38.4 | 37.4    | 37.5         | 30.5          | 22.1           |
| 3D2V_1                      | 3D2V_2  | 13.5 | 12.0    | 11.7         | 19.5          | 11.7           |
| 3D2V_1                      | 2CKY_1  | 48.0 | 45.6    | 44.0         | 38.0          | 37.3           |
| 3D2V_1                      | 2CKY_2  | 51.9 | 49.4    | 46.7         | 42.1          | 42.5           |
| 3D2V_2                      | 2CKY_1  | 41.0 | 38.5    | 35.1         | 31.4          | 27.6           |
| 3D2V_2                      | 2CKY_2  | 40.9 | 36.9    | 30.8         | 27.3          | 31.9           |
| 2CKY_1                      | 2CKY_2  | 42.6 | 39.6    | 37.8         | 27.5          | 24.9           |
| 2PN4_1                      | 2PN4_2  | 42.7 | 40.3    | 37.8         | 27.5          | 31.0           |
| 2PN4_1                      | 2PN3    | 25.0 | 21.2    | 26.7         | 24.1          | 22.2           |
| 2PN4_2                      | 2PN3    | 24.5 | 21.3    | 20.0         | 16.5          | 20.2           |
| Average                     |         | 36.7 | 34.5    | 33.2         | 28.6          | 27.4           |
| Equal to or better than PDB |         |      | 19 / 19 | 16 / 19      | 18 / 19       | 19 / 19        |

RMSD is calculated between all the torsion angles in the model pair.

**Supplementary Table 13.** P-values of Wilcoxon signed-rank test between each method and the starting PDB dataset for all geometric features,  $R$  and  $R_{\text{free}}$ .

|                | Outlier bond | Outlier angle | Clashscore | Outlier backbone rotamer | Potentially incorrect pucker | Number of base-pairs | $R$   | $R_{\text{free}}$ |
|----------------|--------------|---------------|------------|--------------------------|------------------------------|----------------------|-------|-------------------|
| PHENIX         | 0.017        | 0.004         | 0.089      | 0.001                    | < 0.001                      | 0.521                | 0.009 | < 0.001           |
| RNABC-PHENIX   | 0.017        | 0.005         | 0.045      | 0.007                    | < 0.001                      | 0.394                | 0.024 | < 0.001           |
| RCrane-PHENIX  | 0.017        | 0.015         | 0.136      | < 0.001                  | < 0.001                      | 0.733                | 0.450 | 0.014             |
| ERRASER-PHENIX | 0.018        | 0.005         | 0.006      | < 0.001                  | < 0.001                      | 0.009                | 0.011 | < 0.001           |

The Wilcoxon signed-rank test is a non-parametric statistical test for pairs of related samples. The test can tell whether two datasets are significantly different from each other. Therefore it is suitable for the comparison between the PDB-deposited values and values after improvement methods. Here the two-sided P-value for each comparison is given in the table. All data in the benchmark ( $n = 24$ ) are used for the analysis. Calculations are performed with the python library SciPy.



## Supplementary Results

### *ERRASER-PHENIX improves RNA base-pairing geometry*

ERRASER-PHENIX visually improved the base pairing patterns of the RNA models, enhancing the co-planarity of interacting bases. For example, Figure 1f shows a helical region in [3P49](#), a structure solved at 3.55 Å resolution. At this resolution, accurate positioning of base planes into the electron density map was difficult. Manual fits gave base pairs that were buckled or twisted compared to geometries seen in higher-resolution crystallographic models<sup>3</sup>. RNABC and RCrane held the base positions fixed during rebuilding and were thus unable to improve the base-pair planarity. On the other hand, ERRASER-PHENIX improved the planarity of the base-pairs, likely due to the hydrogen bonding potential included in the Rosetta energy function.

Independent base-pair validation tools – which, like MolProbity, would permit unbiased assessment of improvement – are not currently available. However, we applied the base-pair assignment method MC-Annotate<sup>4</sup> and noted that the refined structures gave a higher number of automatically assigned base-pairs than the starting PDB models in 21 out of 24 cases (Supplementary Table 5). For the [3P49](#) case, ERRASER-PHENIX increased the number of base-pairs from 44 in the PDB model to 60. Other methods (RNABC-PHENIX and RCrane-PHENIX) lead to smaller improvements in this case, giving 46 and 44 base-pairs respectively.

### *ERRASER-PHENIX improves the base orientation*

In addition to the base-pairing geometry improvement described above, ERRASER also improved the orientation of bases in the models. The glycosidic torsions in a RNA structure predominantly adopt two distinct conformations: syn and anti<sup>5</sup>. These two conformations can be distinguished by the value of  $\chi$  torsion angle of the glycosidic bond. In the discussion below, the

syn conformation is defined as  $-40^\circ < \chi \leq 140^\circ$ , and the remaining angle ranges are defined as anti, based on the distribution of  $\chi$  angles in RNA09 dataset (Supplementary Fig. 2a, <http://kinemage.biochem.duke.edu/databases/rnadb.php>). It is also evident that the anti conformation is much more probable than syn conformation, and syn pyrimidine conformers are especially rare. Therefore in the current single-nucleotide rebuilding scheme, syn pyrimidine conformers were sampled only if the starting model adopts syn conformation.

Supplementary Table 6 summarized all the notable base orientation changes ( $\Delta\chi > 90^\circ$ ) in the benchmark. While most of the changes are syn-to-anti flips, in agreement with the higher frequency of anti conformations, there are still a few anti-to-syn flips, confirming that ERRASER did not blindly flip the base orientation from syn to anti. To evaluate the confidence of these remodeled bases, these changes were compared to reference models of similar or higher resolution with same or similar sequence. If such models were not available, and there were two different copies of structures in one asymmetric unit, the different copy (to which the target nucleotide did not belong) was used as reference model. For cases where reference models are available, the table shows that for all test cases except the ribosome, all 12 base orientation changes agreed well with the reference. In some cases these orientation changes even introduced extra hydrogen bonds, further supporting these fixes (Supplementary Fig. 2b). For the lowest-resolution ribosome test case ([3OTO](#), 3.69 Å), most of the conformational changes did not match the higher-resolution reference model ([2VGE](#), 2.5 Å). However, since both structures were solved using molecular replacement, it is possible that the two deposited structures inherited the same base orientations from an earlier model<sup>6-7</sup>, therefore might share the same erroneous conformations. By detailed inspection of the conformational changes, we found that the ERRASER changes in [3OTO](#) gave the same or more hydrogen bonds as the starting coordinates

and agreed well with the electron density. For example, Supplementary Figure 2c shows an example of such an orientation change where a guanosine flipped from anti to syn and forming a Watson-Crick vs. Hoogsteen base-pair with two extra hydrogen bonds. The density map of higher-resolution model did not falsify the possibility of this new, energetically more favorable conformation. On the other hand, Supplementary Figure 2d demonstrates a case where the flipping is ambiguous, where a uridine flipped from syn to anti, and both conformations have one hydrogen bond with nearby nucleotide. Although the starting conformation fits slightly better in the higher-resolution density map, it is possible that the alternative conformation also existed in the crystal structure with a smaller occupancy. Across the benchmark, ERRASER-PHENIX gave improved, or at least alternatively possible, conformations for the base orientation in RNA.

#### *Pairwise comparison for models with similar sequences*

Analogous to the independent comparison between remodeled low-resolution and original high-resolution models (see the main text), we reasoned that pairs of models with the same or similar RNA sequences should give similar conformations at corresponding nucleotides, and an accurate refinement procedure should maintain or improve this similarity. We drew 19 such structural pairs from three categories: models of the same sequences determined independently at different resolutions (11 cases, same pairs as those used in high-res vs. low-res comparisons); two copies present in the asymmetric unit related by non-crystallographic symmetry (7 cases); and the conserved regions of two aptamer domains in glycine riboswitch (1 case). Supplementary Table 10-11 summarizes the results of the similarity comparison of the torsion angles of each nucleotide pair, sugar pucker assignment and the RMSD in torsional space for these structure pairs. In nearly all cases, ERRASER-PHENIX improved these metrics compared to the PDB models, and gave better average values than RNABC-PHENIX and RCrane-PHENIX.

## Supplementary Notes

*Example Rosetta command lines used in ERRASER-PHENIX*

(1) Full structure minimization.

```
erraser_minimizer.<exe> -native <input pdb> -out_pdb <output  
pdb> -score::weights rna/rna_hires_elec_dens -  
score:rna_torsion_potential RNA11_based_new -constrain_P true -  
vary_geometry true -fixed_res <fixed residue list> -  
edensity:mapfile <map file> -edensity:mapreso 2.0 -  
edensity:realign no
```

(2) Single nucleotide rebuilding with analytical chain closure.

```
swa_rna_analytical_closure.<exe> -algorithm rna_resample_test -s  
<input pdb> -native <native pdb> -out:file:silent blah.out -  
sampler_extra_syn_chi_rotamer true -  
sampler_extra_anti_chi_rotamer true -constraint_chi true -  
sampler_cluster_rmsd 0.1 -sampler_native_rmsd_screen true -  
sampler_native_screen_rmsd_cutoff 3.0 -sampler_num_pose_kept 100  
-PBP_clustering_at_chain_closure true -  
allow_chain_boundary_jump_partner_right_at_fixed_BP true -  
add_virt_root true - rm_virt_phosphate true -sample_res 2 -  
cutpoint_closed 2 -fasta fasta -input_res 1 3-4 -fixed_res 1 3-  
4 -jump_point_pairs NOT_ASSERT_IN_FIXED_RES 1-4 -alignment_res  
1-4 -rmsd_res 4 -score:weights rna/rna_hires_elec_dens -  
edensity:mapfile <map file> -edensity:mapreso 2.0 -  
edensity:realign no -score:rna_torsion_potential RNA11_based_new
```

(3) Single nucleotide rebuild at terminal nucleotides.

```
swa_rna_main.<exe> -algorithm rna_resample_test -s <input pdb> -  
native <native pdb> -out:file:silent blah.out -  
sampler_extra_syn_chi_rotamer true -  
sampler_extra_anti_chi_rotamer true -constraint_chi true -  
sampler_cluster_rmsd 0.1 -sampler_native_rmsd_screen true -  
sampler_native_screen_rmsd_cutoff 3.0 -sampler_num_pose_kept 100  
-PBP_clustering_at_chain_closure true -  
allow_chain_boundary_jump_partner_right_at_fixed_BP true -  
add_virt_root true - rm_virt_phosphate true -sample_res 2 -  
cutpoint_closed 2 -fasta fasta -input_res 1-4 -fixed_res 2-4 -  
jump_point_pairs NOT_ASSERT_IN_FIXED_RES 1-4 -alignment_res 1-4
```

```
-rmsd_res 4 -score:weights rna/rna_hires_elec_dens -  
edensity:mapfile <map file> -edensity:mapreso 2.0 -  
edensity:realign no -score:rna_torsion_potential RNA11_based_new
```

*Example PHENIX command lines used in ERRASER-PHENIX*

(1) phenix.ready\_set.

```
phenix.ready_set 3E5E.pdb
```

(2) One-cycle TLS refinement.

```
phenix.refine 2QUS-sf.mtz 2QUS.updated.pdb GTP.cif  
2QUS.metal.edits 2QUS.link.edits tls.params  
main.number_of_macro_cycles=1 strategy=tls
```

(3) Three-cycle refinement with manual parameter set.

```
phenix.refine 2GIS-sf.mtz 2GIS.pdb 2GDI.metal.edits  
ordered_solvent=true optimize_adp_weight=true  
strategy=individual_sites+individual_adp+occupancies  
main.number_of_macro_cycles=3 wxc_scale=0.1
```

(4) Three-cycle refinement with automatically optimized target weight.

```
phenix.refine 2GIS-sf.mtz  
2GIS_phenix_erraser_refine_001_refine_001.pdb  
2GIS_phenix_erraser_refine_001_refine_001.metal.edits  
ordered_solvent=true optimize_adp_weight=true  
strategy=individual_sites+individual_adp+occupancies  
main.number_of_macro_cycles=3 optimize_xyz_weight=true
```

(5) Density map creation.

```
phenix.maps maps.params
```

```
maps.params:
```

```
...  
  map {  
    map_type = 2mFo-DFc  
    format = xplor *ccp4  
    file_name = 2GIS_cell.ccp4
```

```
kicked = True
fill_missing_f_obs = True
grid_resolution_factor = 1/4.
region = selection *cell
atom_selection = None
atom_selection_buffer = 3
sharpening = False
sharpening_b_factor = None
exclude_free_r_reflections = True
isotropize = True
}
...
```

1. Richardson, J.S. et al. RNA backbone: Consensus all-angle conformers and modular string nomenclature (an RNA Ontology Consortium contribution). *RNA* **14**, 465-481 (2008).
2. Chen, V.B. et al. MolProbity: all-atom structure validation for macromolecular crystallography. *Acta Cryst. D* **66**, 12-21 (2010).
3. Stombaugh, J., Zirbel, C.L., Westhof, E. & Leontis, N.B. Frequency and isostericity of RNA base pairs. *Nucleic Acids Res.* **37**, 2294-2312 (2009).
4. Gendron, P., Lemieux, S. & Major, F. Quantitative analysis of nucleic acid three-dimensional structures. *J. Mol. Biol.* **308**, 919-936 (2001).
5. Bloomfield, V.A. et al. *Nucleic Acids: Structures, Properties, and Functions*. (University Science Books, 2000).
6. Demirci, H. et al. Modification of 16S ribosomal RNA by the KsgA methyltransferase restructures the 30S subunit to optimize ribosome function. *RNA* **16**, 2319-2324 (2010).
7. Kurata, S. et al. Modified Uridines with C5-methylene Substituents at the First Position of the tRNA Anticodon Stabilize U-G Wobble Pairing during Decoding. *J. Biol. Chem.* **283**, 18801-18811 (2008).
